# Supplementary material for: Triamterene Functions as an Effective Nonsense Suppression Agent for MPS I-H (Hurler Syndrome)
Source: MDPI journal article supplement (doi:10.3390/ijms24054521), 2023-02-24
Supplement: s1 [file s1]

**Supplementary Table S1:** List of top hits identified using a NanoLuc dual readthrough/NMD reporter in the presence of low dose G418.

| Compound     | Function                                                              | Drug Conc.     | Drug Alone Fold-Increase (rel. to basal) | +G418 Fold-Increase (rel. to G418 alone) |
|--------------|-----------------------------------------------------------------------|----------------|------------------------------------------|------------------------------------------|
| Imatinib     | Bcr-Abl inhibitor; anti-cancer                                        | 60 $\mu$ M     | 5                                        | 59                                       |
| Triamterene  | ENaC inhibitor; diuretic for hypertension & edema                     | 60 $\mu$ M     | 13                                       | 38                                       |
| AB00993554   | SR compound                                                           | 30 $\mu$ g/mL  | 7                                        | 32                                       |
| Doxazocin    | $\alpha_1$ -sensitive alpha blocker; hypertension & urinary retention | 60 $\mu$ M     | 4                                        | 31                                       |
| GS-6201      | adenosine A <sub>2B</sub> antagonist; anti-inflammatory               | 60 $\mu$ M     | 10                                       | 31                                       |
| AB00990535   | SR compound                                                           | 30 $\mu$ g/mL  | 12                                       | 26                                       |
| Verteporfin  | photosensitizer to eliminate abnormal blood vessels in the eye        | 60 $\mu$ M     | 4                                        | 22                                       |
| AB00989308   | SR compound                                                           | 30 $\mu$ g/mL  | 6                                        | 22                                       |
| AB00993402   | SR compound                                                           | 30 $\mu$ g/mL  | 10                                       | 20                                       |
| AB00989525   | SR compound                                                           | 30 $\mu$ g/mL  | 6                                        | 19                                       |
| Tandutinib   | FLT2 inhibitor; anti-cancer                                           | 60 $\mu$ M     | 4                                        | 19                                       |
| AB00990301   | SR compound                                                           | 30 $\mu$ g/mL  | 7                                        | 18                                       |
| Tadalafil    | PDE5 inhibitor; hypertension; erectile dysfunction                    | 60 $\mu$ M     | 2                                        | 18                                       |
| Naloxonazine | $\mu$ -opioid receptor antagonist                                     | 60 $\mu$ M     | 3                                        | 18                                       |
| Elacridar    | ABC transporter inhibitor; tumor multi-drug Resistance                | 60 $\mu$ M     | 5                                        | 17                                       |
| Quinacrine   | anti-malarial                                                         | 60 $\mu$ M     | 25                                       | 15                                       |
| Vorinostat   | histone deacetylase inhibitor; anti-cancer                            | 60 $\mu$ M     | 37                                       | 12                                       |
| G418 alone   | readthrough control                                                   | 100 $\mu$ g/mL | 12                                       | 1                                        |

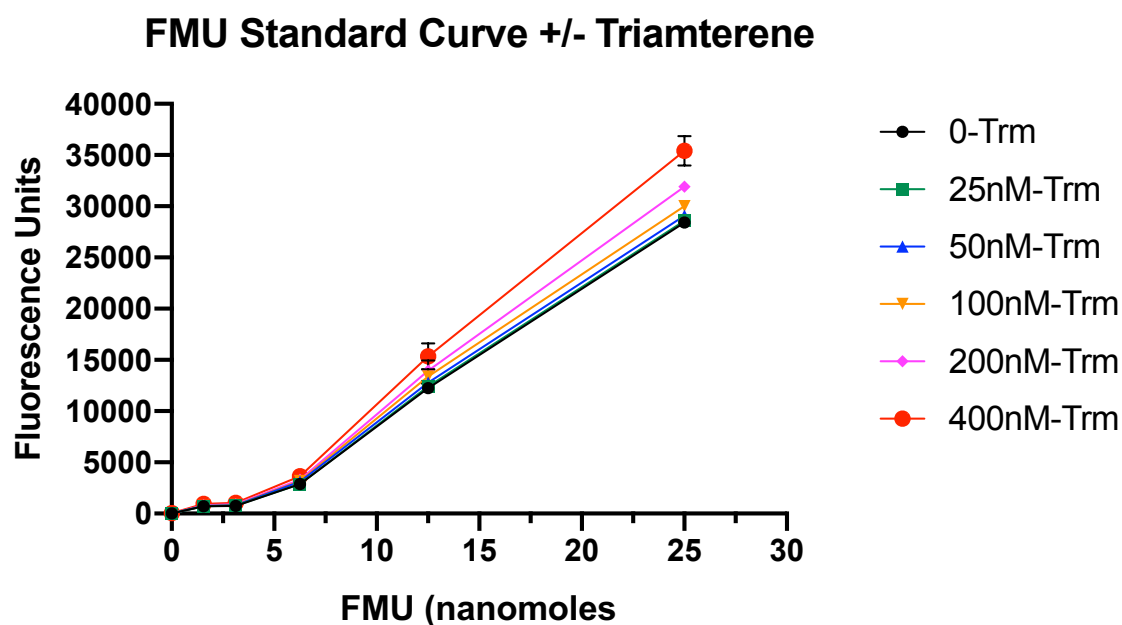

**Supplementary Figure S1:** FMU standard curve +/- triamterene. Standard curves were generated to calculate  $\alpha$ -L-iduridase activity by measuring the fluorescence units generated using free acid 4-methyl-umbelliferone (nanomoles) in the presence of vehicle only (0-Trm) or triamterene ranging from 25-400 nM. Each data point is the mean +/- SD of three replicates.

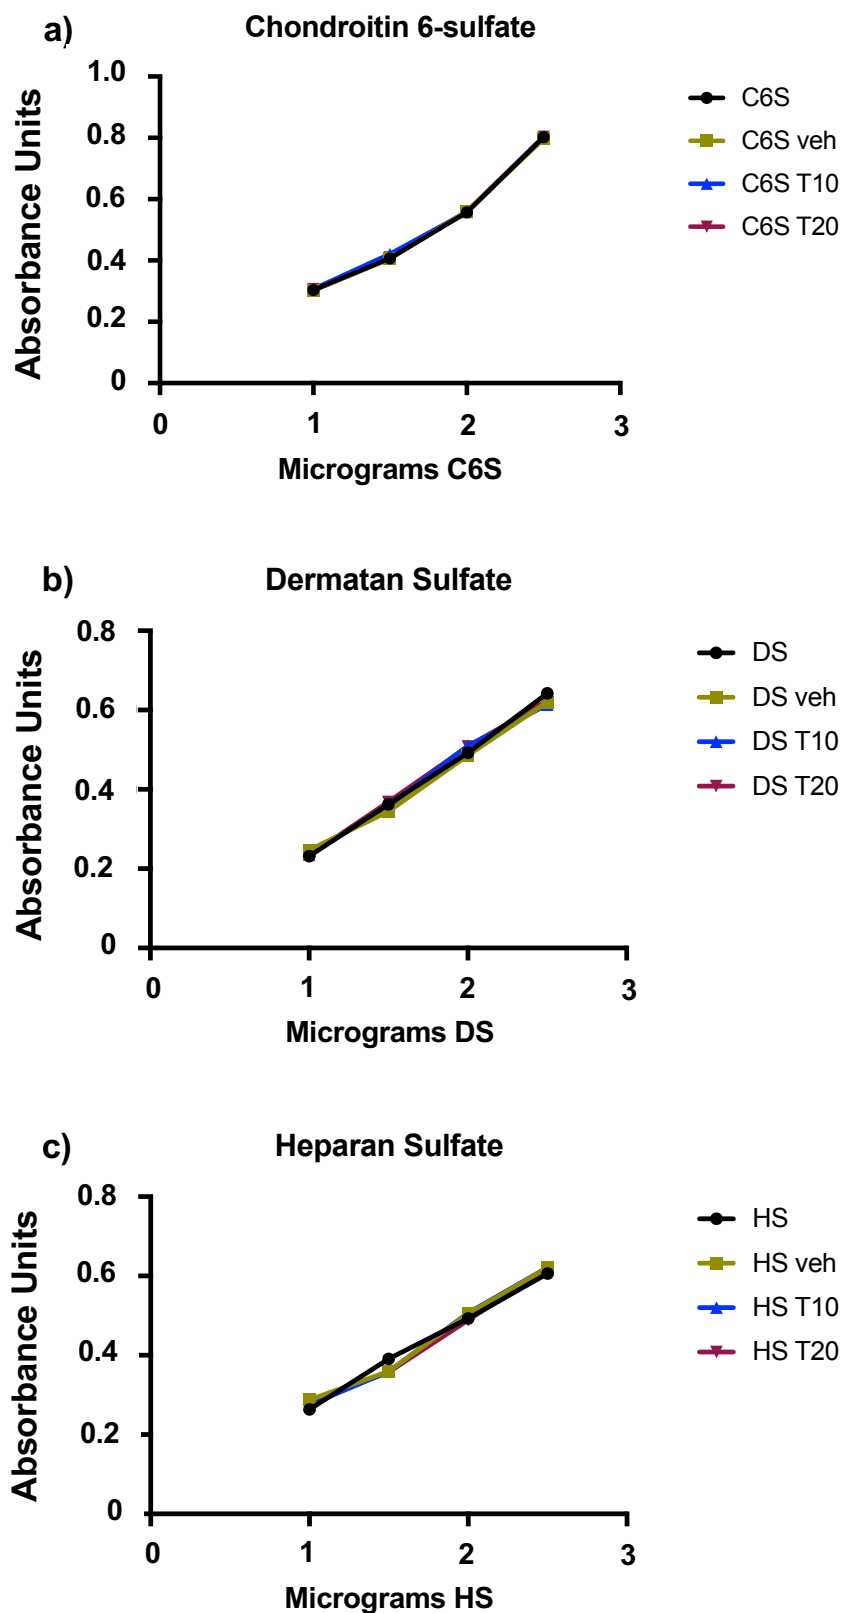

**Supplementary Figure S2:** Triamterene does not interfere with the GAG dye-binding assay. Standard curves were generated using the Blyscan GAG dye-binding assay with (a) chondroitin 6-sulfate (C6S), (b) dermatan sulfate (DS), or (c) heparan sulfate (HS) in the absence and presence of vehicle, T10 = 10  $\mu$ M triamterene, or T20 = 20  $\mu$ M triamterene. Each data point is the mean  $\pm$  SD of three replicates.

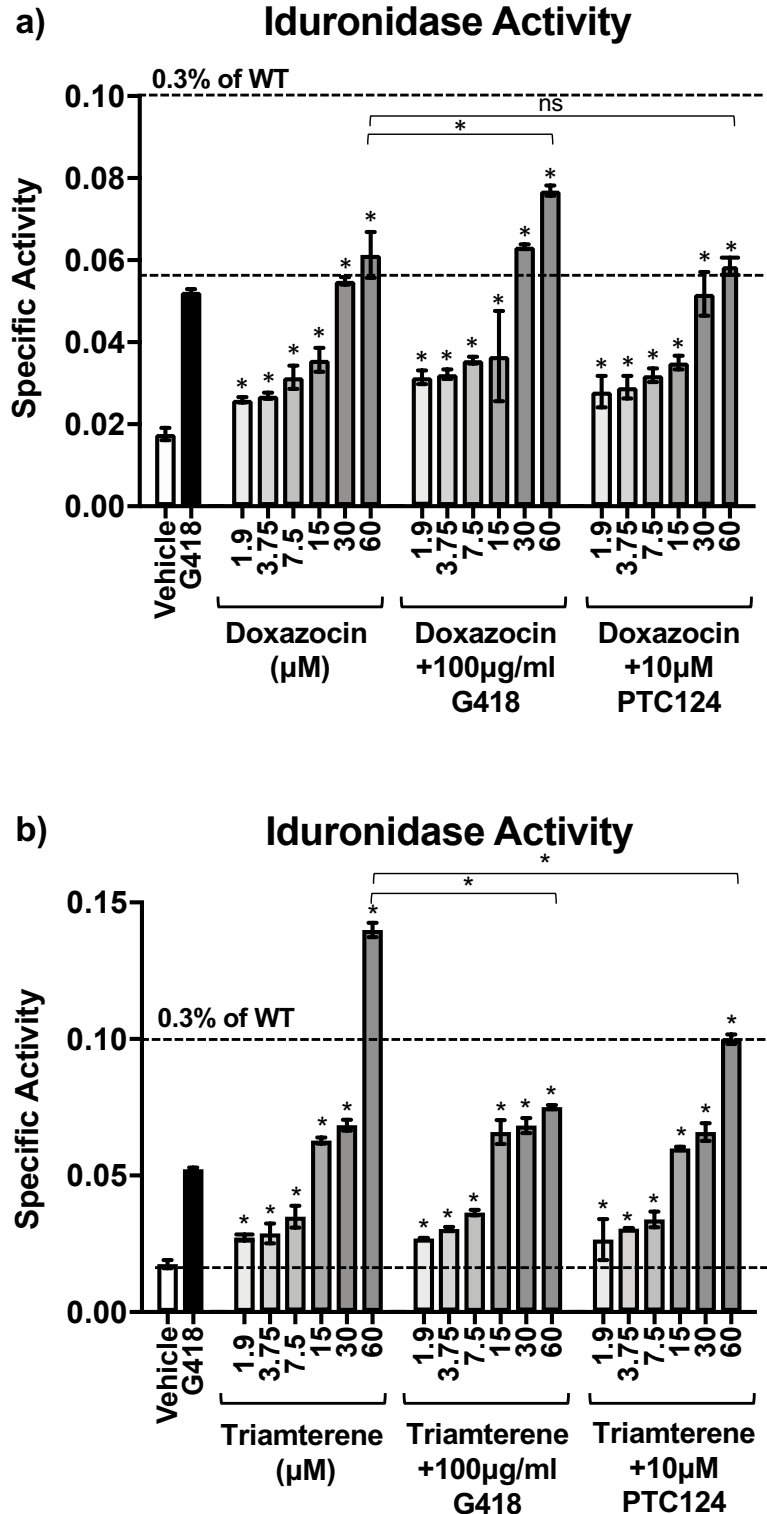

**Supplementary Figure S3:** Triamterene does not produce synergistic increases in  $\alpha$ -L-iduronidase activity when combined with G418 or PTC124 in *Idua*-W402X MEFs. Each column represents the mean  $\pm$  SD of two independent experiments ( $n = 6-8$ ). In panels a & b, the dashed line represents 0.3% of WT  $\alpha$ -L-iduronidase activity. \* above each column indicates  $p < 0.05$  when comparing treated samples with the vehicle and \* above a bracket indicates  $p < 0.05$  when comparing the 60 $\mu$ M treatment alone when compared to 60 $\mu$ M combined with other readthrough compounds; ns = not significant ( $p > 0.05$ ).

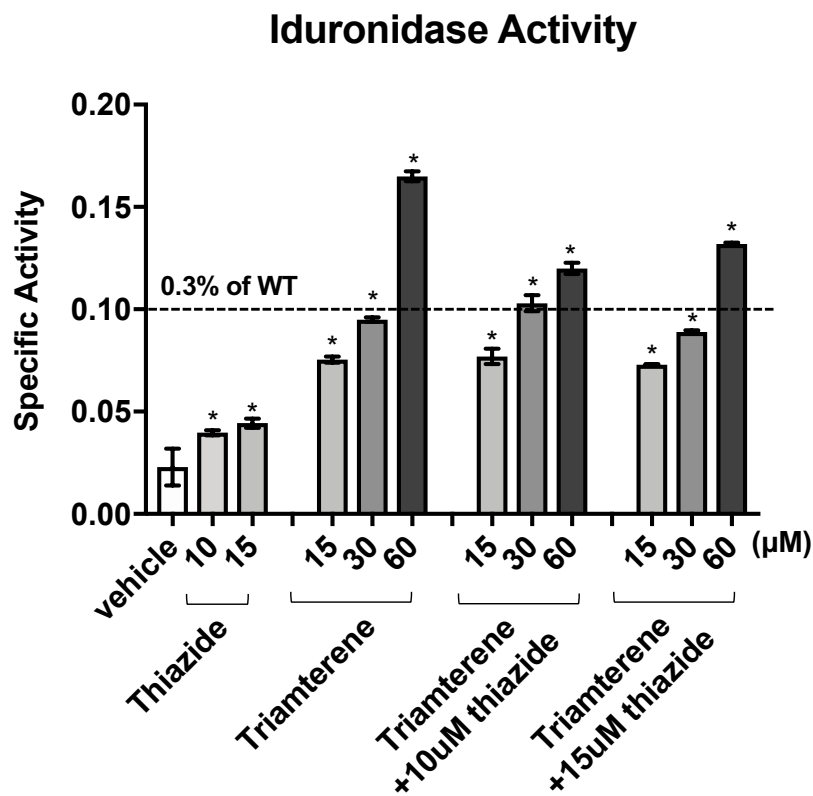

**Supplementary Figure S4:** Thiazide, a diuretic normally administered clinically with triamterene, does not interfere with the ability of triamterene to suppress the *Idua*-W402X mutation in MEFs. Each column represents the mean  $\pm$  SD of two independent experiments (n= 6-8). The dashed line represents 0.3% of WT  $\alpha$ -L-iduronidase activity. \* indicates  $p < 0.05$  when comparing treated cells to vehicle alone.

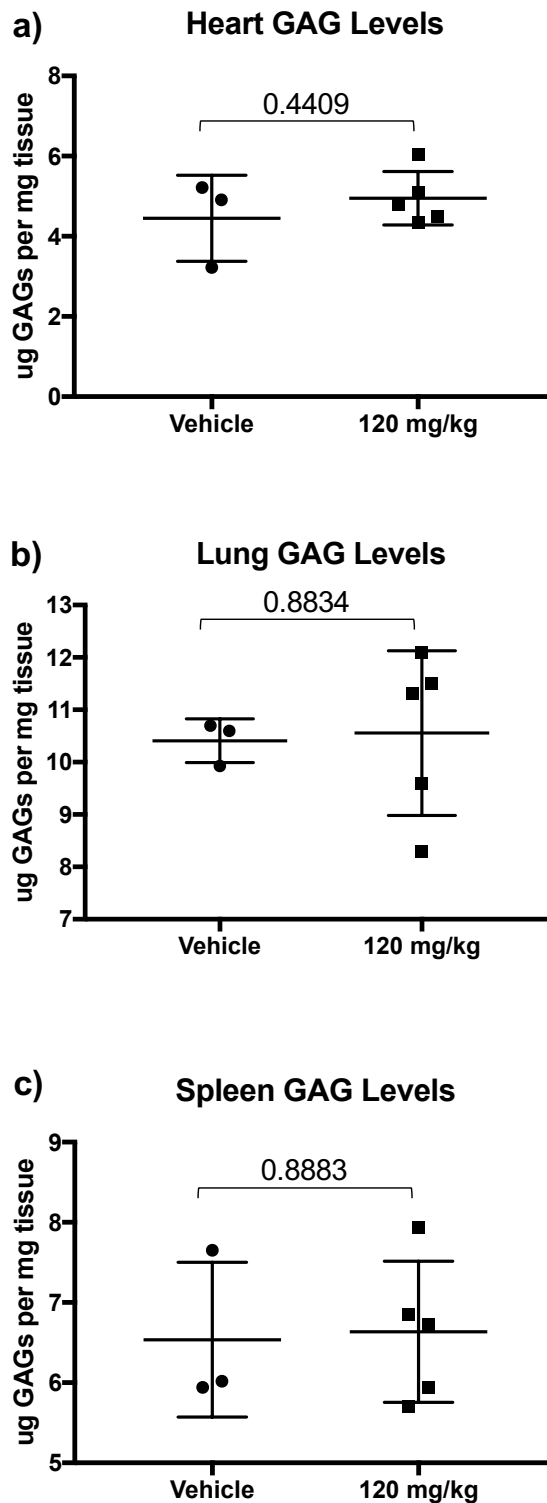

**Supplementary Figure S5:** Triamterene does not reduce GAG levels in *Idua*-KO mice. 8-week-old *Idua*-KO mice were administered triamterene once daily via oral gavage for a total of 2 weeks (14 doses). 24 hours after the final dosing, mouse tissues were collected upon sacrifice. Sulfated GAG levels in defatted, dried tissue homogenates were quantified using a GAG dye-binding assay <sup>12</sup>. GAG levels were quantified in the following mouse tissues: **(a)** heart; **(b)** lung; **(c)** spleen. Each point represents the average GAG value obtained from an individual mouse. Exact p values were calculated using a two-tailed t-test.

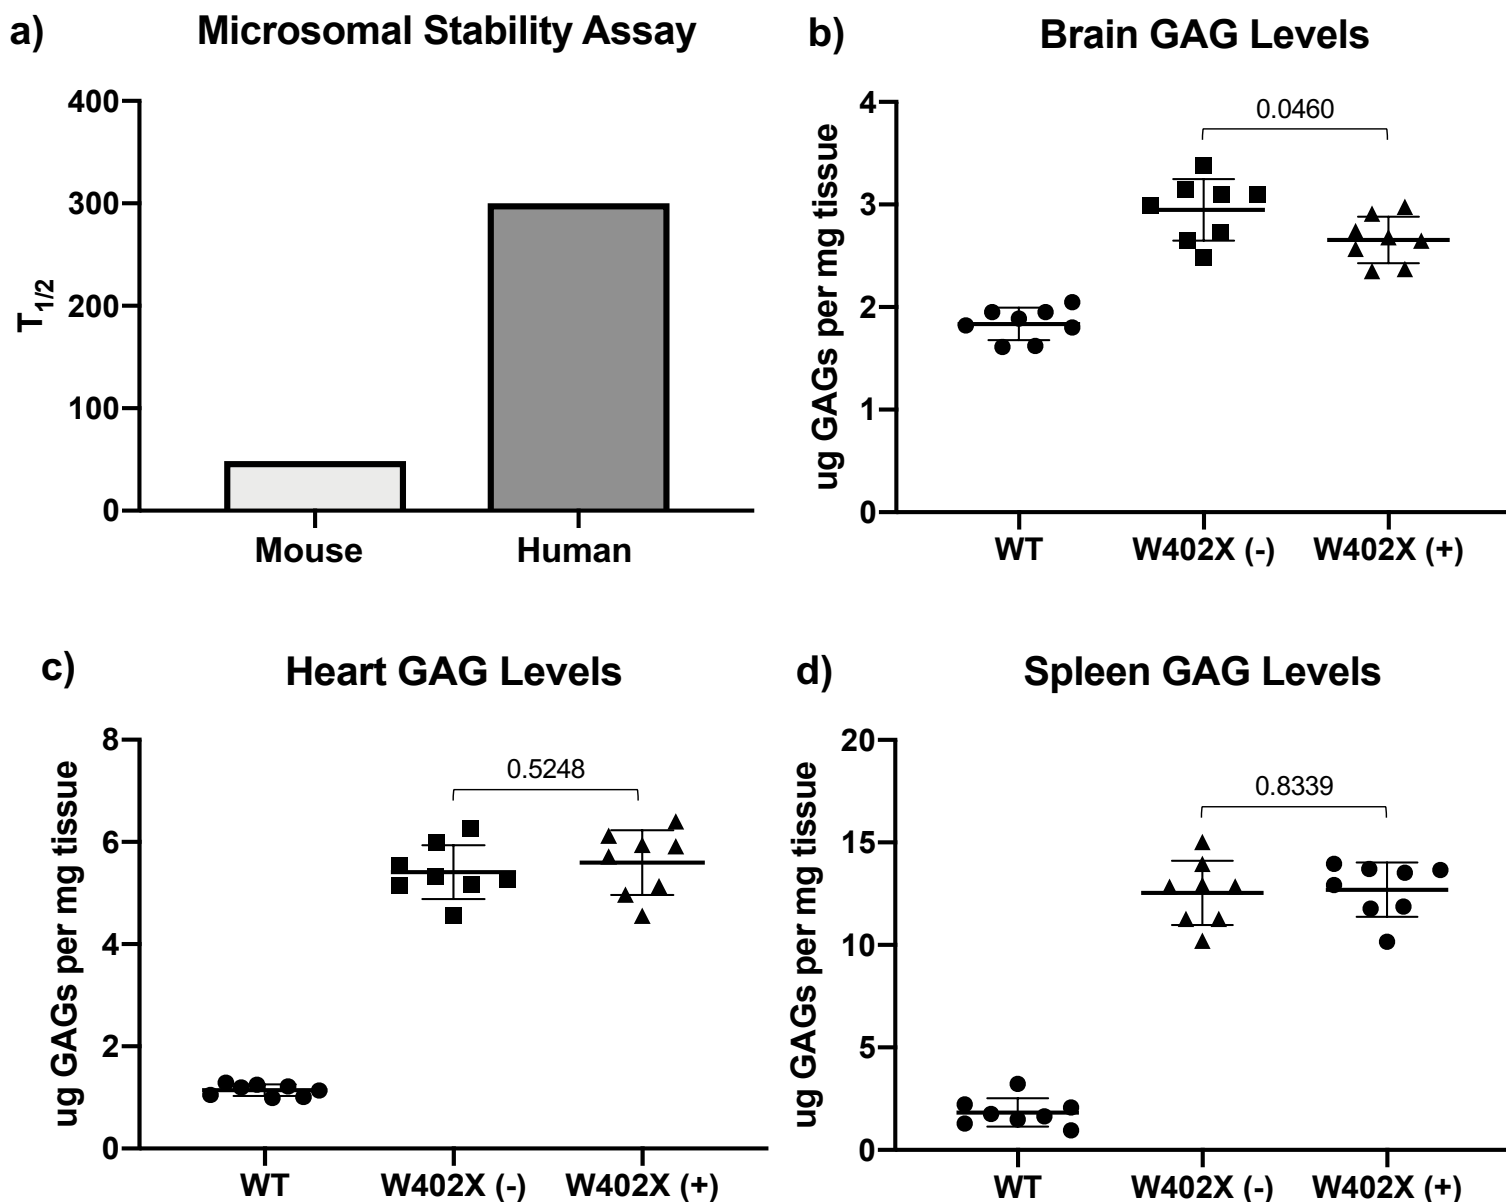

**Supplementary Figure S6:** Extensive triamterene metabolism in mice inactivates its ability to induce readthrough. **(a)** Microsomal stability assay comparing triamterene metabolism in human versus mouse microsomes; expressed as the time (minutes) at which half of the parental compound remains. Each column presents the mean of two replicate experiments. GAG levels in the **(b)** brain, **(c)** heart, and **(d)** spleen of *Idua*-W402X mice after 26-weeks of triamterene treatment (120 mg/kg once daily via oral gavage). Each point represents the average GAG value obtained from an individual mouse, with 8 mice included in each cohort. Exact p values were calculated using an unpaired, two-tailed t-test; the cohorts compared are indicated by the brackets. Note that  $p < 0.0001$  when comparing all WT and W402X cohorts.
